# Supplementary material
Source: MDPI journal article supplement (https://www.mdpi.com/2673-401X/3/3/20)
Supplement: s1 [file s1]

# Supplementary Materials

## An Unexpected Reaction Between Diaryliodonium Salts and DMSO

*Konrad Kepski and Wesley J. Moran\**

Department of Chemical Sciences, University of Huddersfield,  
Queensgate, Huddersfield HD1 3DH, U. K.

*w.j.moran@hud.ac.uk*

Current Data Parameters  
NAME KK-458  
EXPNO 10  
PROCNO 1

F2 - Acquisition Parameters  
Date\_ 20220511  
Time 9.29 h  
INSTRUM spect  
PROBHD Z116098\_0048 (  
PULPROG zg30  
TD 65536  
SOLVENT CDC13  
NS 16  
DS 2  
SWH 8223.685 Hz  
FIDRES 0.250967 Hz  
AQ 3.9845889 sec  
RG 147.88  
DW 60.800 usec  
DE 10.80 usec  
TE 298.0 K  
D1 2.00000000 sec  
TD0 1  
SF01 400.1324710 MHz  
NUC1 1H  
P0 3.08 usec  
P1 9.25 usec  
PLW1 24.00000000 W

F2 - Processing parameters  
SI 32768  
SF 400.1300099 MHz  
WDW EM  
SSB 0  
LB 0.30 Hz  
GB 0  
PC 1.50

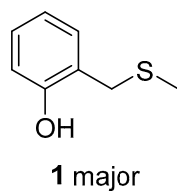

+

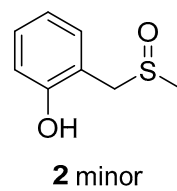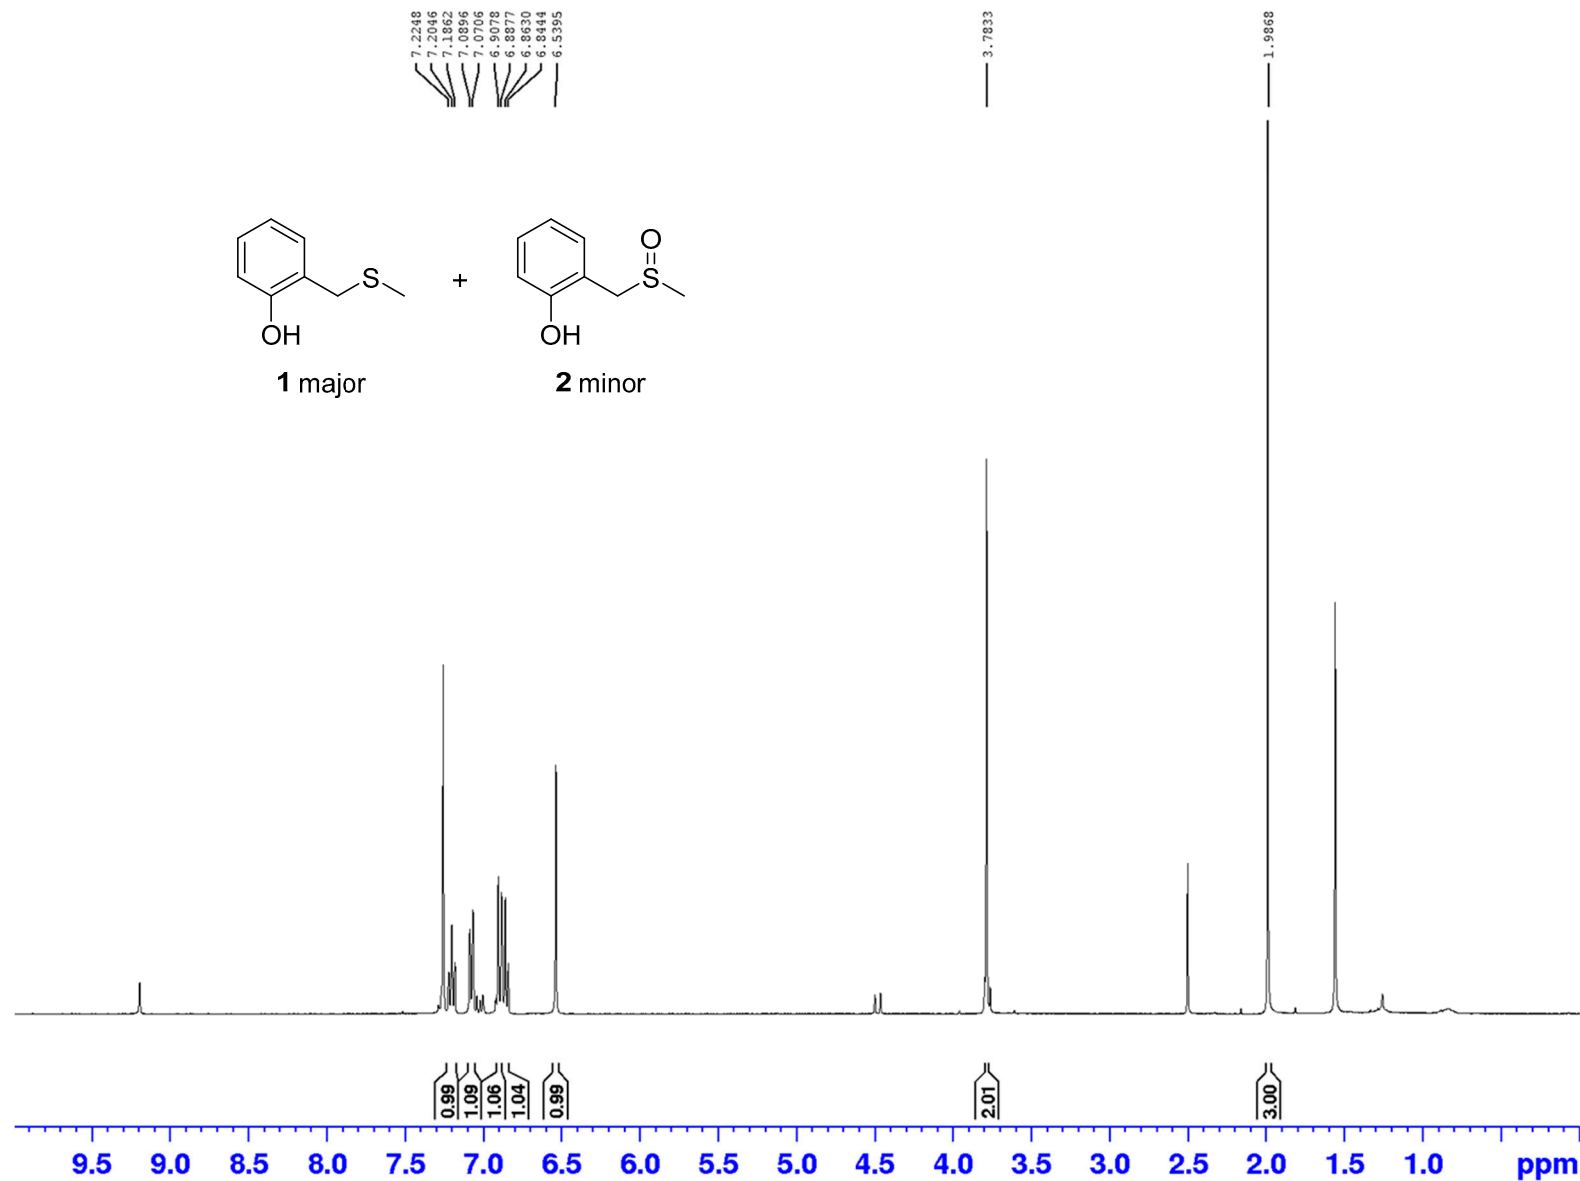

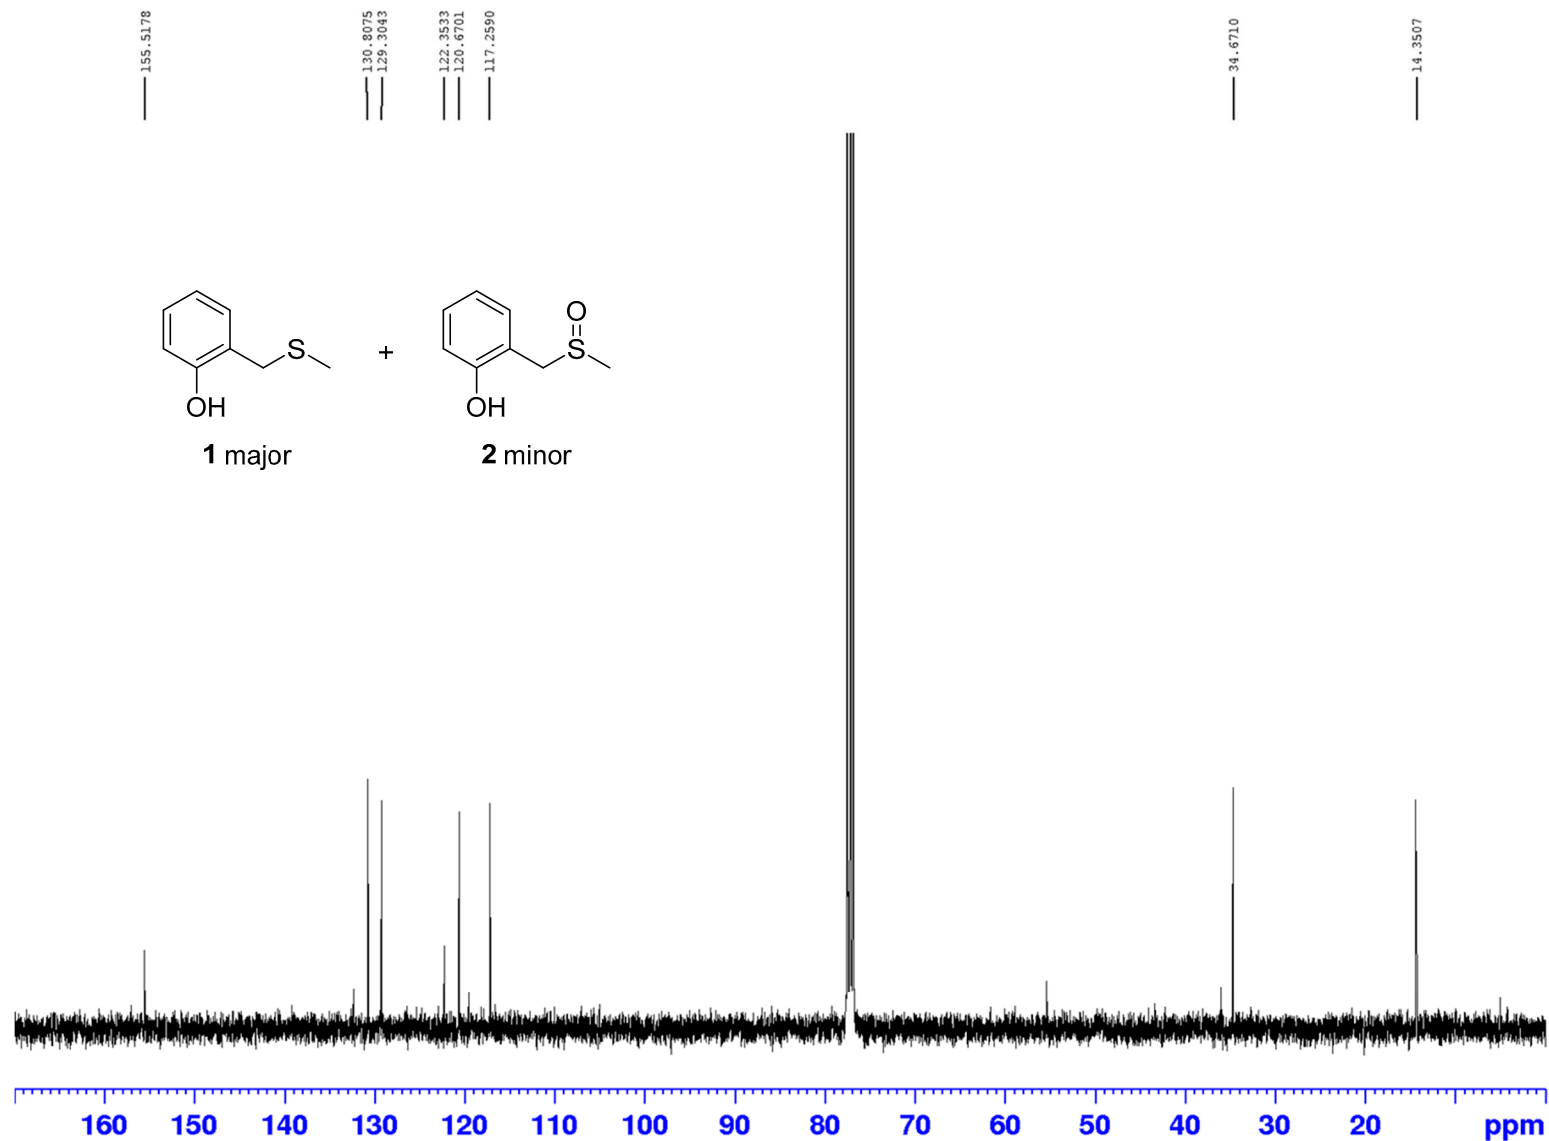

Current Data Parameters  
NAME KR-458  
EXPNO 51  
PROCNO 1

F2 - Acquisition Parameters  
Date\_ 20220511  
Time 19.40 h  
INSTRUM spect  
PROBHD Z116098\_0048 (   
PULPROG zgpg30  
TD 65536  
SOLVENT CDC13  
NS 1024  
DS 4  
SWH 24038.461 Hz  
FIDRES 0.733596 Hz  
AQ 1.3631488 sec  
RG 181.72  
DW 20.800 usec  
DE 8.54 usec  
TE 298.0 K  
D1 2.00000000 sec  
D11 0.03000000 sec  
TD0 8  
SFO1 100.6228303 MHz  
NUC1 13C  
P0 3.00 usec  
P1 9.00 usec  
PLW1 77.00000000 W  
SFO2 400.1316005 MHz  
NUC2 1H  
CPDPRG[2] waltz16  
PCPD2 90.00 usec  
PLW2 24.00000000 W  
PLW12 0.25352001 W  
PLW13 0.12751999 W

F2 - Processing parameters  
SI 65536  
SF 100.6127552 MHz  
WDW EM  
SSB 0  
LB 1.00 Hz  
GB 0  
PC 1.40

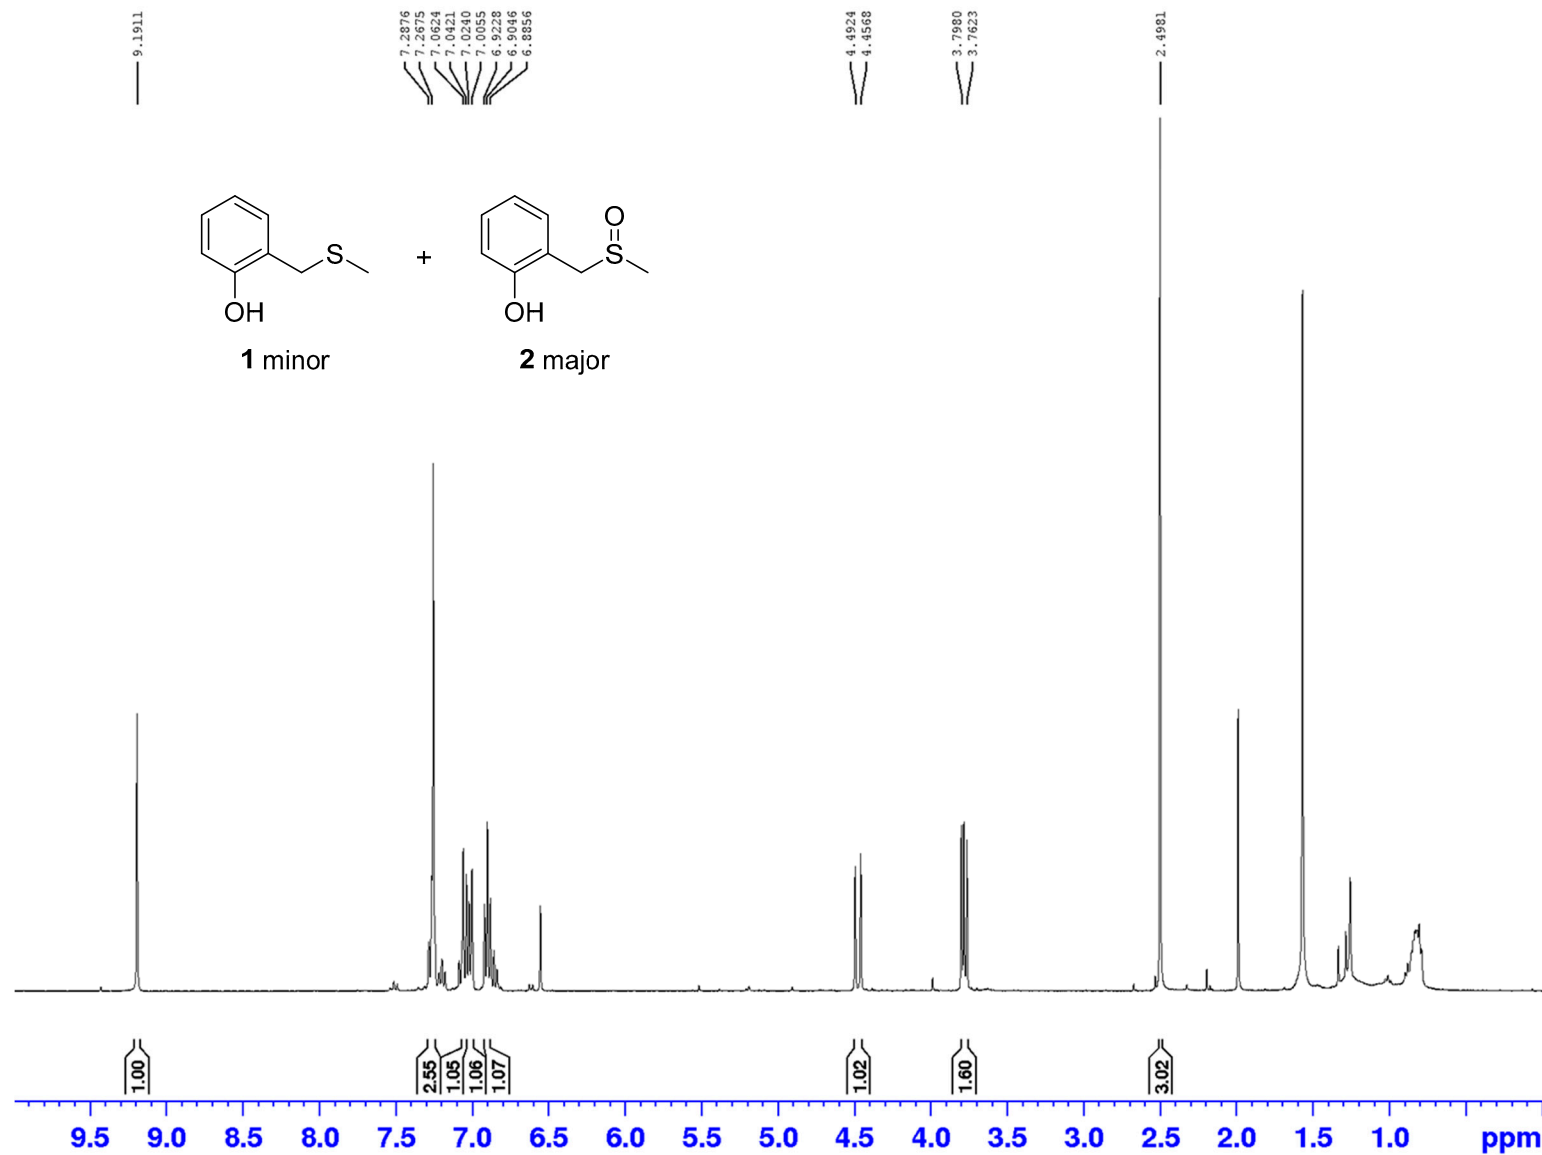

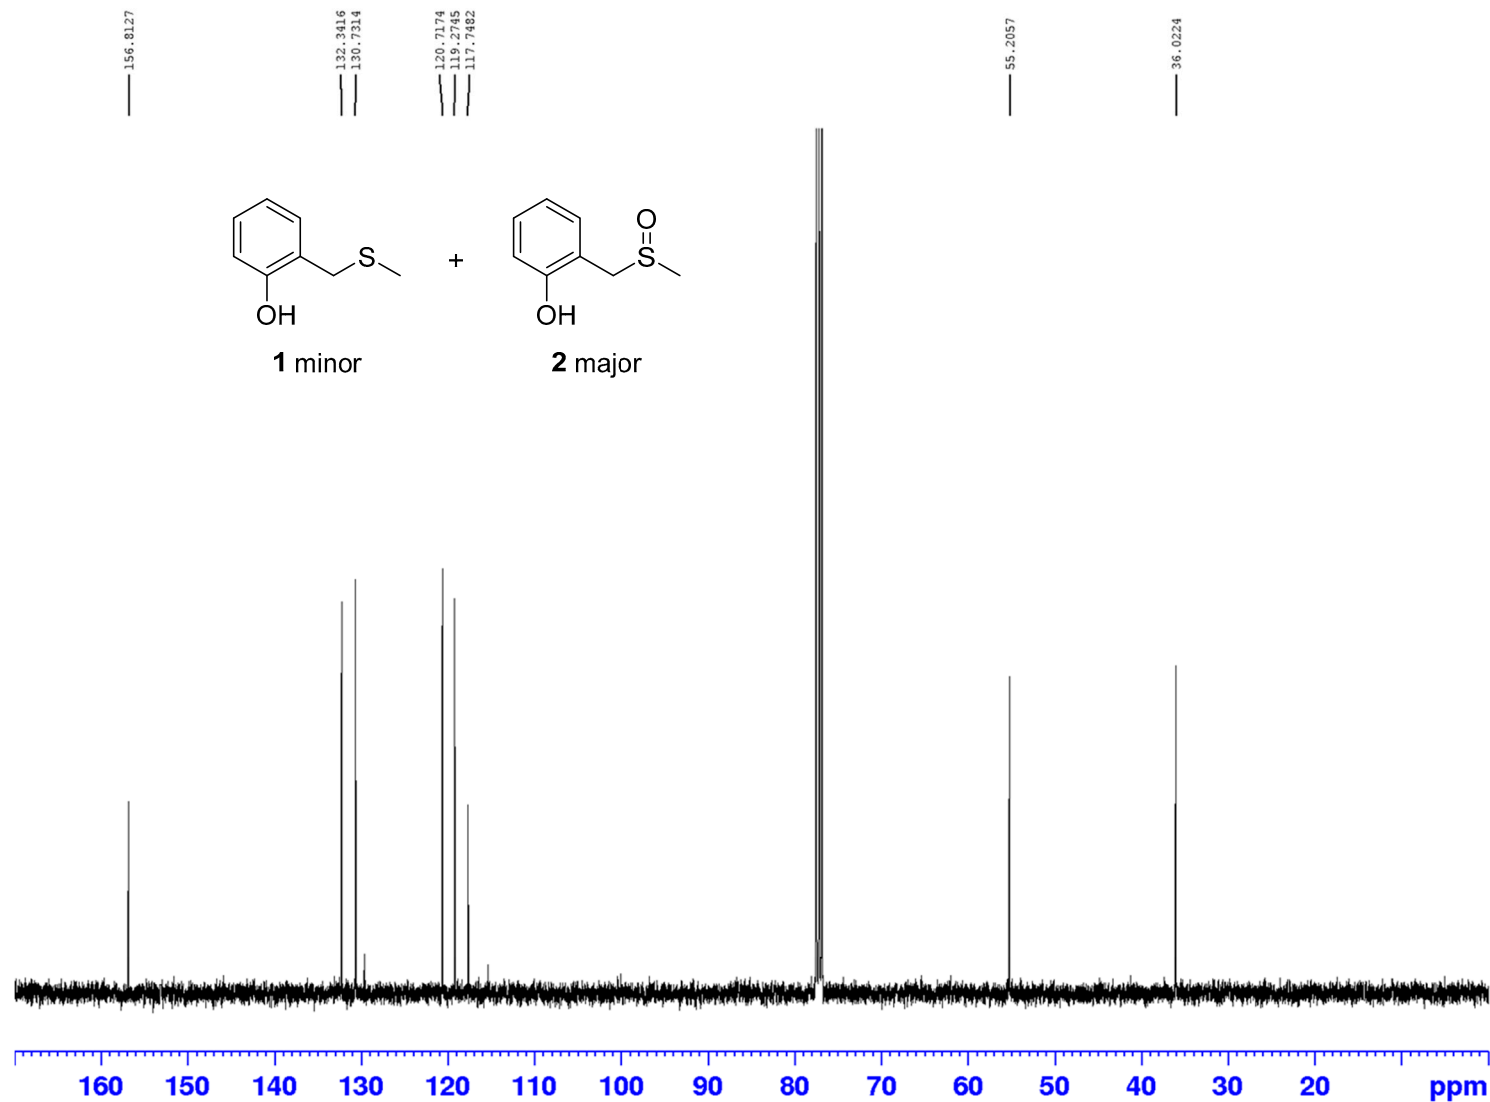

Current Data Parameters  
NAME KK-119 f19-38  
EXPNO 11  
PROCNO 1

F2 - Acquisition Parameters  
Date\_ 20210218  
Time 17.12 h  
INSTRUM spect  
PROBHD 2116098\_0048 (  
PULPROG zgpg30  
TD 65536  
SOLVENT CDCl3  
NS 256  
DS 4  
SWH 24038.461 Hz  
FIDRES 0.733596 Hz  
AQ 1.3631488 sec  
RG 181.72  
DW 20.800 usec  
DE 10.09 usec  
TE 294.7 K  
D1 2.00000000 sec  
D11 0.03000000 sec  
TD0 8  
SF01 100.6228303 MHz  
NUC1 13C  
P0 3.00 usec  
P1 9.00 usec  
PLW1 77.00000000 W  
SF02 400.1316005 MHz  
NUC2 1H  
CPDPRG[2] waltz16  
PCPD2 90.00 usec  
PLW2 24.00000000 W  
PLW12 0.25352001 W  
PLW13 0.12751999 W

F2 - Processing parameters  
SI 65536  
SF 100.6127586 MHz  
WDW EM  
SSB 0  
LB 1.00 Hz  
GB 0  
PC 1.40

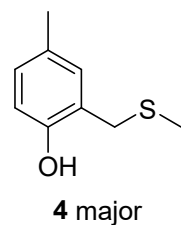

+

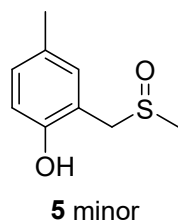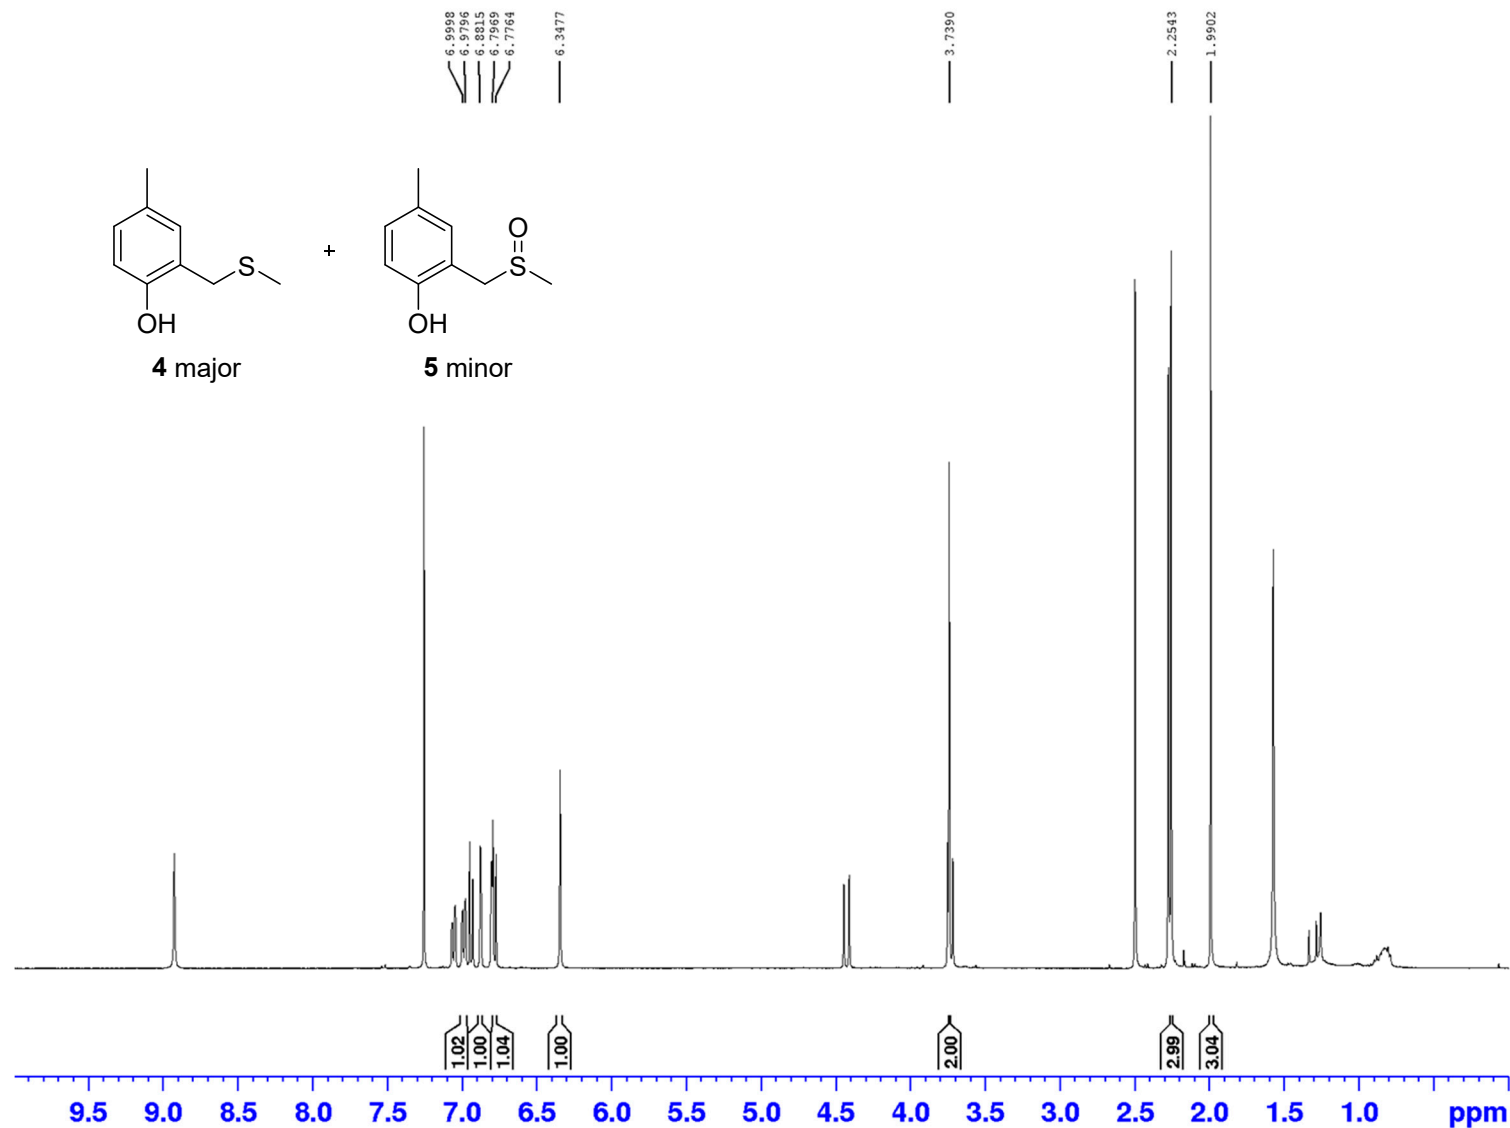

Current Data Parameters  
NAME KK-459  
EXPNO 20  
PROCNO 1

F2 - Acquisition Parameters  
Date\_ 20220513  
Time 15.07 h  
INSTRUM spect  
PROBHD Z116098\_0048 (  
PULPROG zg30  
TD 65536  
SOLVENT CDCl3  
NS 16  
DS 2  
SWH 8223.685 Hz  
FIDRES 0.250967 Hz  
AQ 3.9845889 sec  
RG 147.88  
DW 60.800 usec  
DE 10.80 usec  
TE 298.0 K  
D1 2.00000000 sec  
TD0 1  
SF01 400.1324710 MHz  
NUC1 1H  
P0 3.08 usec  
P1 9.25 usec  
PLW1 24.00000000 W

F2 - Processing parameters  
SI 32768  
SF 400.1300103 MHz  
WDW EM  
SSB 0  
LB 0.30 Hz  
GB 0  
PC 1.50

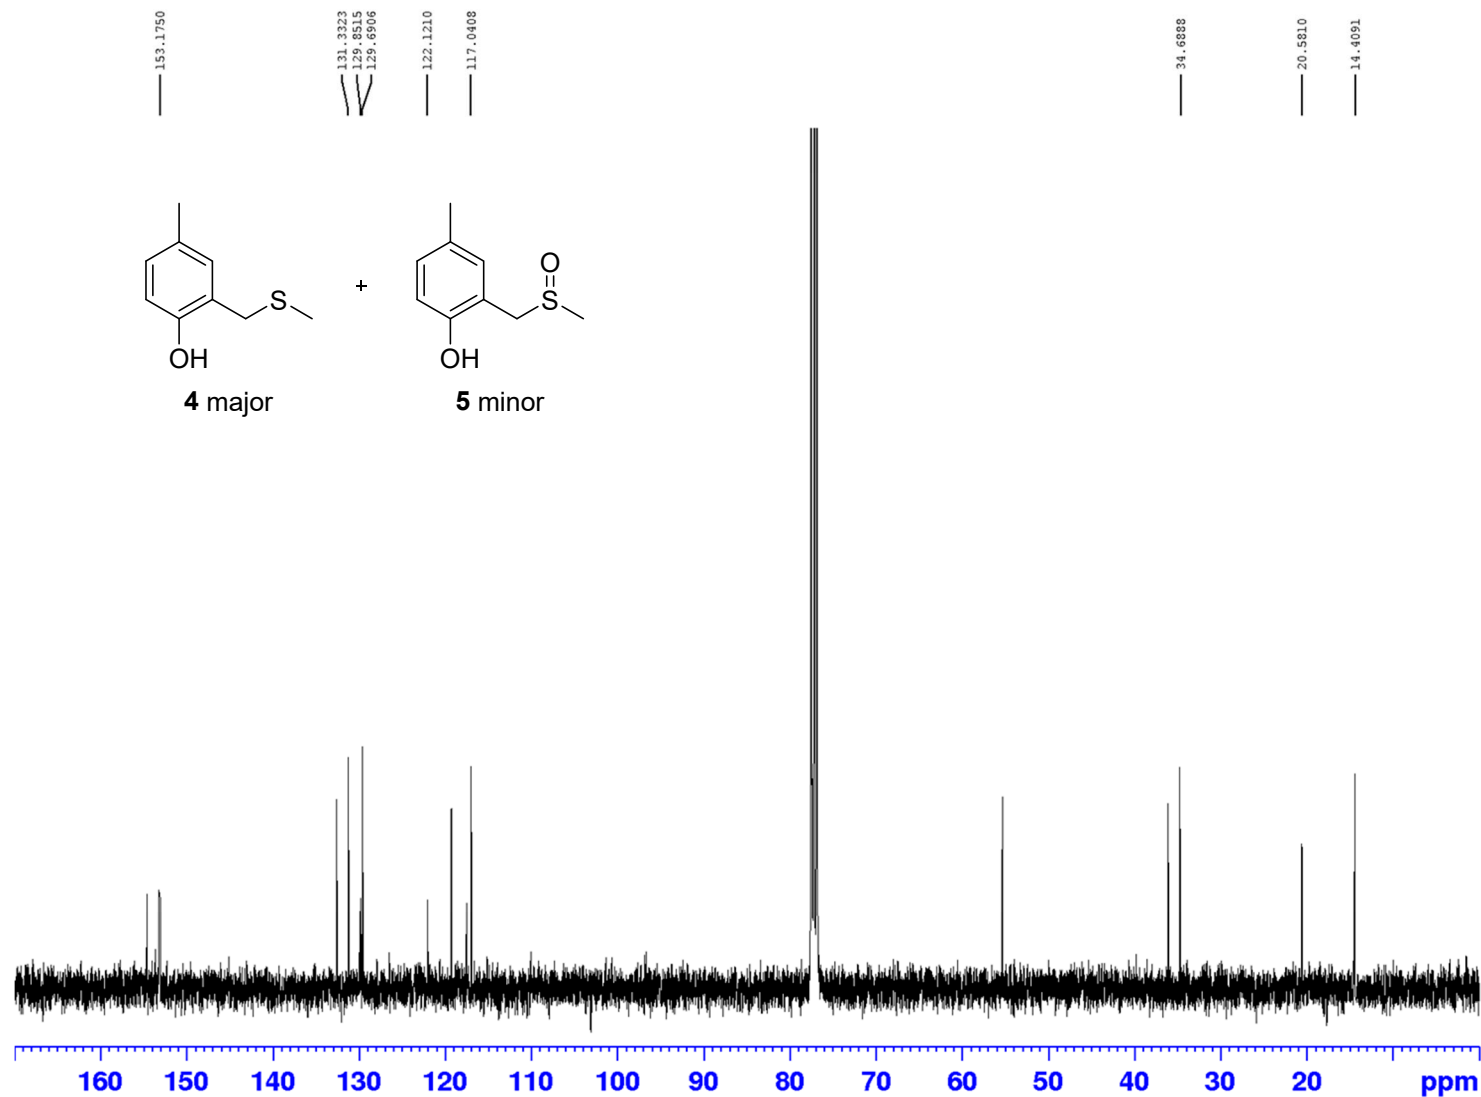

Current Data Parameters  
NAME KK-459  
EXPNO 70  
PROCNO 1

F2 - Acquisition Parameters  
Date\_ 20220514  
Time 10.48 h  
INSTRUM spect  
PROBHD Z116098\_0048 (  
PULPROG zgpg30  
TD 65536  
SOLVENT CDCl3  
NS 1024  
DS 4  
SWH 24038.461 Hz  
FIDRES 0.733596 Hz  
AQ 1.3631488 sec  
RG 181.72  
DW 20.800 usec  
DE 0.54 usec  
TE 298.0 K  
D1 2.00000000 sec  
D11 0.03000000 sec  
TD0 8  
SFO1 100.6228303 MHz  
NUC1 13C  
P0 3.00 usec  
P1 9.00 usec  
PLW1 77.00000000 W  
SFO2 400.1316005 MHz  
NUC2 1H  
CPDPRG[2] waltz16  
PCPD2 90.00 usec  
PLW2 24.00000000 W  
PLW12 0.25352001 W  
PLW13 0.12751999 W

F2 - Processing parameters  
SI 65536  
SF 100.6127552 MHz  
WDW EM  
SSB 0  
LB 1.00 Hz  
GB 0  
PC 1.40

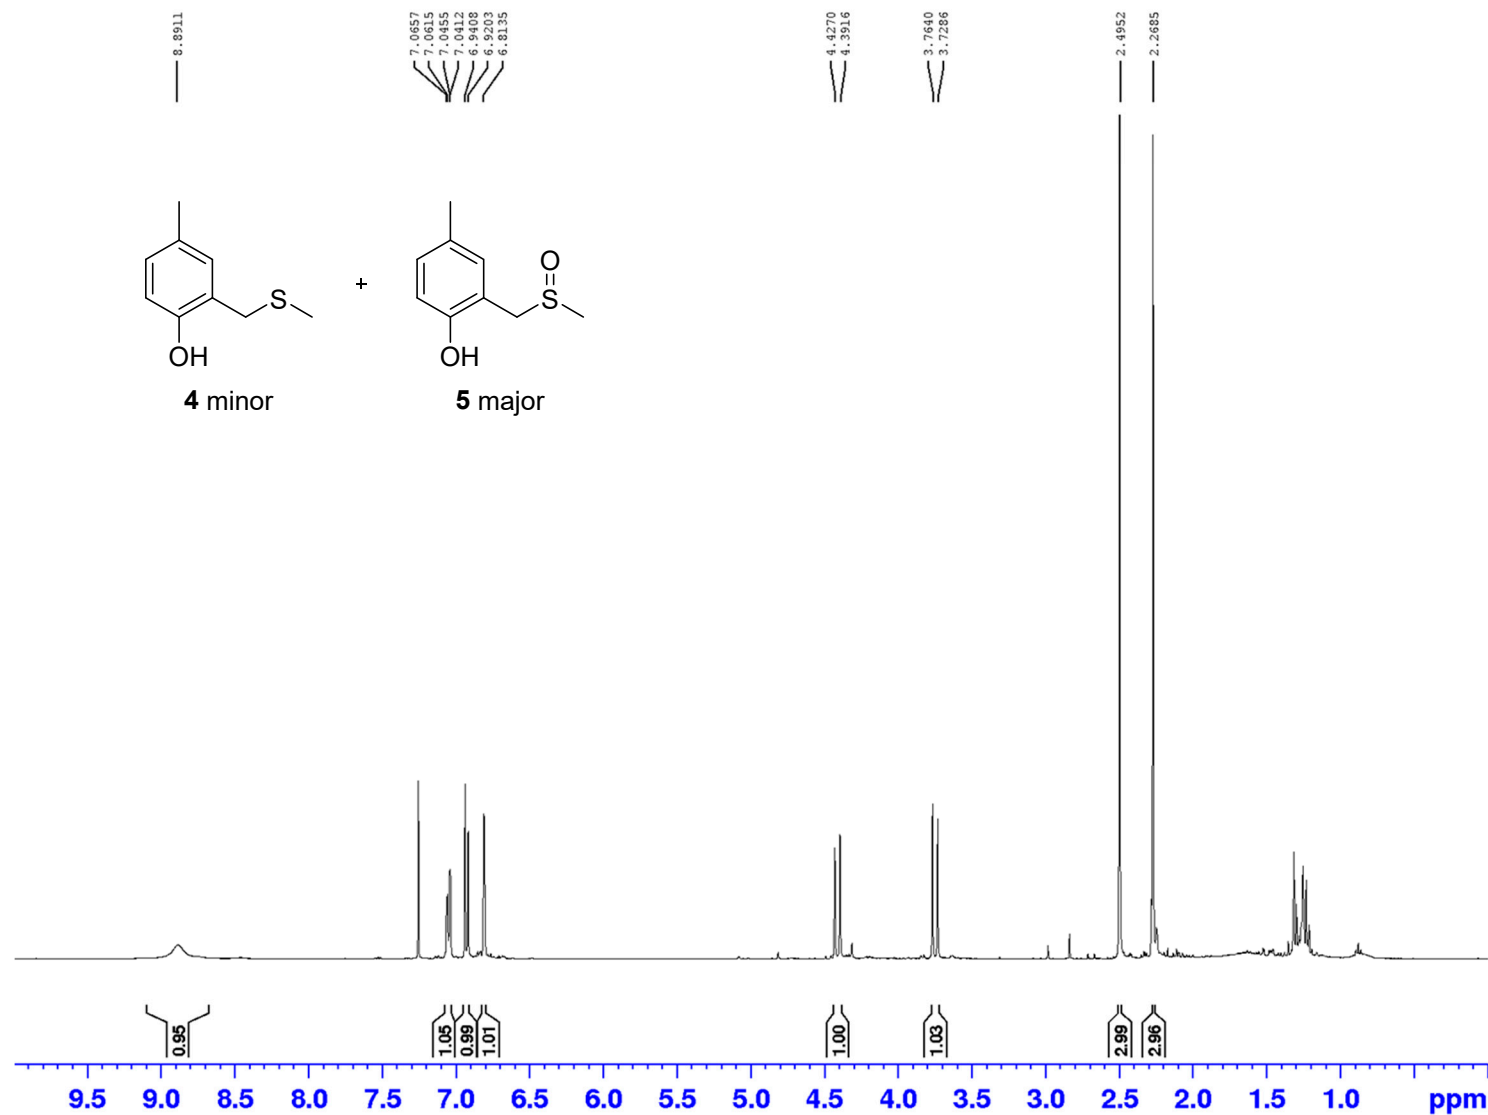

Current Data Parameters  
NAME KK-459  
EXPNO 10  
PROCNO 1

F2 - Acquisition Parameters  
Date\_ 20220513  
Time 15.02 h  
INSTRUM spect  
PROBHD Z116098\_0048 (  
PULPROG zg30  
TD 65536  
SOLVENT CDCl3  
NS 16  
DS 2  
SWH 8223.685 Hz  
FIDRES 0.250967 Hz  
AQ 3.9845889 sec  
RG 147.88  
DW 60.800 usec  
DE 10.80 usec  
TE 298.0 K  
D1 2.00000000 sec  
TD0 1  
SFO1 400.1324710 MHz  
NUC1 1H  
P0 3.08 usec  
P1 9.25 usec  
PLW1 24.00000000 W

F2 - Processing parameters  
SI 32768  
SF 400.1300087 MHz  
WDW EM  
SSB 0  
LB 0.30 Hz  
GB 0  
PC 1.50



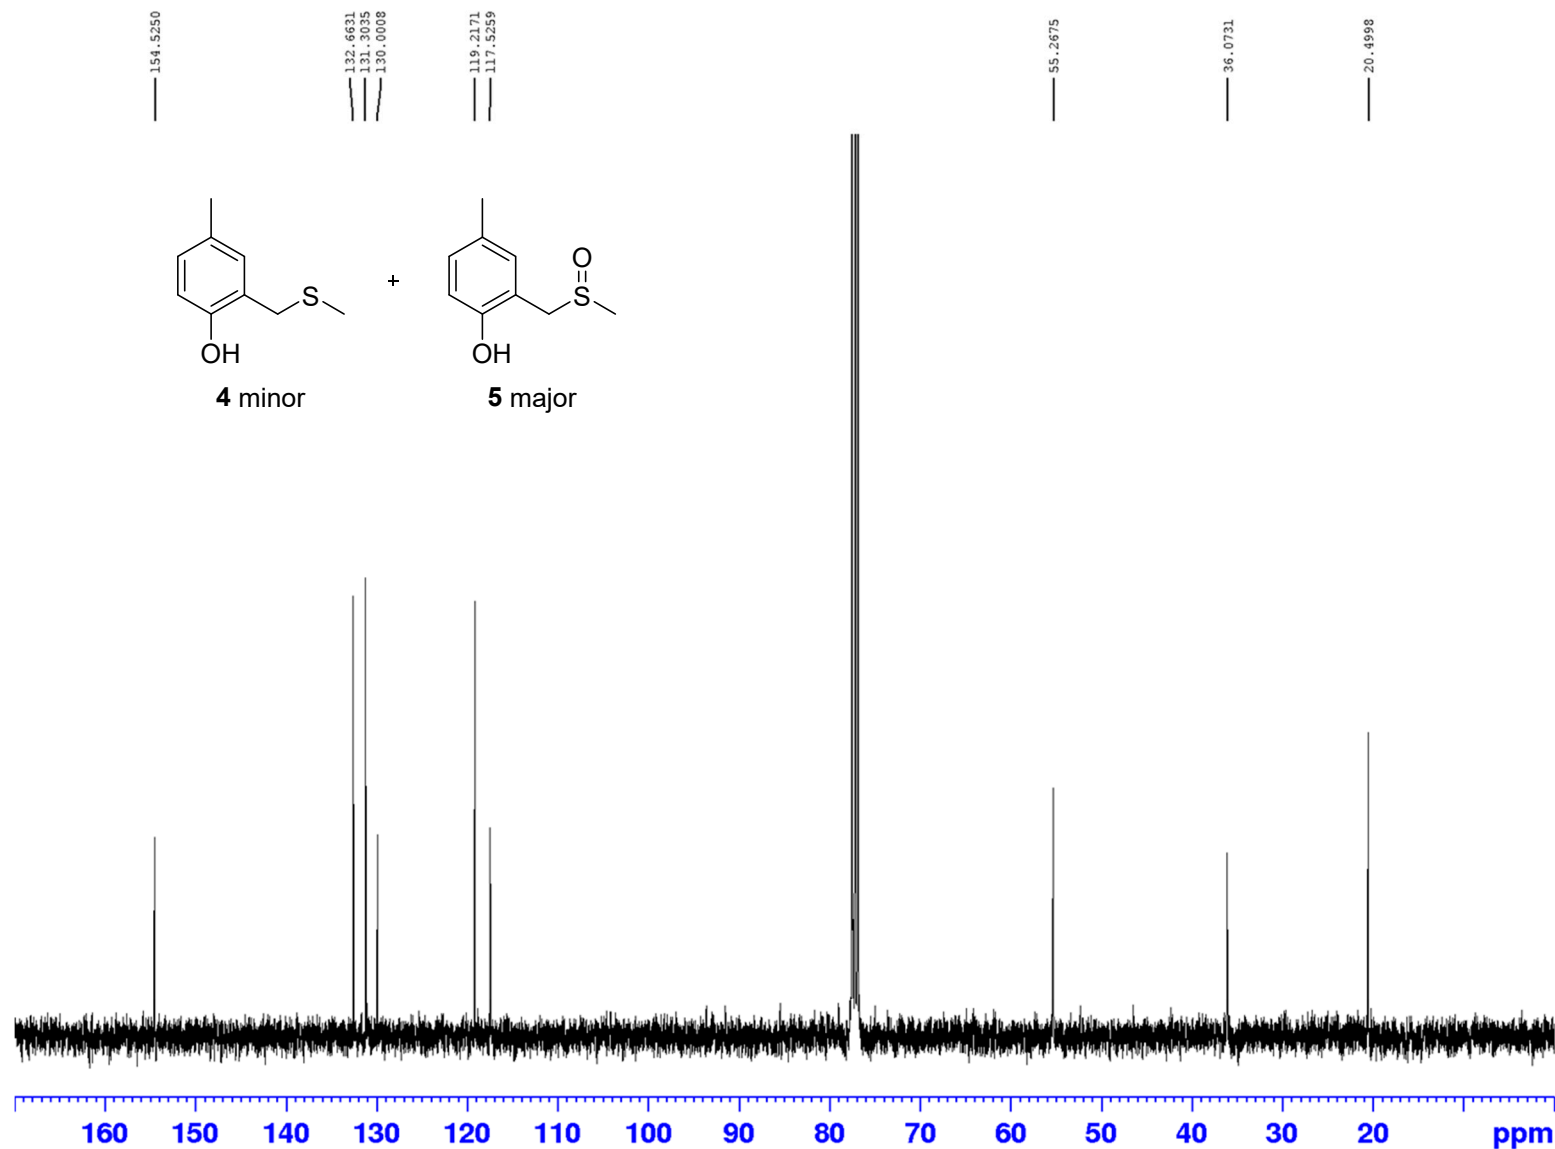

Current Data Parameters  
NAME KK-459  
EXPNO 61  
PROCNO 1

F2 - Acquisition Parameters  
Date\_ 20220514  
Time 9.45 h  
INSTRUM spect  
PROBHD Z116098\_0048 (  
PULPROG zgpg30  
TD 65536  
SOLVENT CDCl3  
NS 512  
DS 4  
SWH 24038.461 Hz  
FIDRES 0.733596 Hz  
AQ 1.3631488 sec  
RG 181.72  
DW 20.800 usec  
DE 8.54 usec  
TE 298.0 K  
D1 2.00000000 sec  
D11 0.03000000 sec  
TD0 8  
SFO1 100.6228303 MHz  
NUC1 13C  
P0 3.00 usec  
P1 9.00 usec  
PLW1 77.00000000 W  
SFO2 400.1316005 MHz  
NUC2 1H  
CPDPRG[2] waltz16  
PCPD2 90.00 usec  
PLW2 24.00000000 W  
PLW12 0.25352001 W  
PLW13 0.12751999 W

F2 - Processing parameters  
SI 65536  
SF 100.6127558 MHz  
WDW EM  
SSB 0  
LB 1.00 Hz  
GB 0  
PC 1.40
